# Supplementary material for: Unveiling the quantum secrets of triel metal triangles: a tale of stability, aromaticity, and relativistic effects
Source: Royal Society of Chemistry journal article supplement (doi:10.1039/d4cp00484a), 2024-01-01
Supplement: d4cp00484a1.pdf [file d4cp00484a1.pdf]

# Unveiling the Quantum Secrets of Triel Metal Triangles: A Tale of Stability, Aromaticity, and Relativistic Effects

Sílvia Escayola<sup>1,2</sup>, Elisa Jimenez-Izal<sup>2,3</sup>, Eduard Matito<sup>3,4</sup>, Jesus M.  
Ugalde<sup>2,3</sup>, Rafael Grande-Aztatzi<sup>2,5,\*</sup>, and Jose M. Mercero<sup>2,3,\*</sup>

<sup>1</sup>Institute of Computational Chemistry and Catalysis and Department of Chemistry, University of Girona, C/ M. Aurèlia Capmany, 69, 17003 Girona, Catalonia, Spain

<sup>2</sup>Donostia International Physics Center (DIPC), 20018 Donostia, Euskadi, Spain

<sup>3</sup>Kimika Fakultatea, Euskal Herriko Unibertsitatea (UPV/EHU), P.K. 1072, 20080 Donostia, Euskadi, Spain

<sup>4</sup>IKERBASQUE, Basque Foundation for Science, 48013 Bilbao, Euskadi, Spain

<sup>5</sup>Escuela de Ingeniería y Ciencias, Tecnológico de Monterrey, Av. Eugenio Garza Sada 2501, 64849 Monterrey, Nuevo León, México.

April 8, 2024

# 1 Supporting Information

**Table S1** Different properties of the lowest lying energy spin-states of the  $X_3^-$  ( $X=$  Al, Ga, In and Tl) triangles.  $\Delta E$  is ZPE corrected MCQDP/MCSCF (10,12) relative energy with respect to the singlet in kcal/mol. R corresponds to the equilibrium bond lengths in Å. MCI is the total multicenter index,  $MCI_\pi$  is the  $\pi$  contribution to MCI.

| M               | $\Delta E$ | $R_{1,3}^{1,2}$ | $R_{2,3}$ | MCI  | $MCI_\pi$ |
|-----------------|------------|-----------------|-----------|------|-----------|
| $Al_3^-$        |            |                 |           |      |           |
| $^1A'_1$        | 0.0        | 2.558           |           | 0.49 | 0.23      |
| $^3B_2$         | 7.36       | 2.543           | 2.762     | 0.35 | 0.22      |
| $^3A_1^\dagger$ | 7.57       | 2.651           | 2.536     | 0.37 | 0.23      |
| $^3A_2$         | 12.41      | 2.619           | 2.951     | 0.25 | 0.03      |
| $^3B_1$         | 13.39      | 2.800           | 2.561     | 0.27 | 0.03      |
| $^5A''_2$       | 12.18      | 2.758           |           | 0.12 | 0.03      |
| $Ga_3^-$        |            |                 |           |      |           |
| $^1A'_1$        | 0.0        | 2.576           |           | 0.48 | 0.24      |
| $^3B_2$         | 7.04       | 2.552           | 2.835     | 0.35 | 0.23      |
| $^3A_1^\dagger$ | 7.41       | 2.684           | 2.504     | 0.35 | 0.23      |
| $^3A_2$         | 11.64      | 2.615           | 3.075     | 0.27 | 0.03      |
| $^3B_1^\dagger$ | 12.80      | 3.075           | 2.558     | 0.27 | 0.03      |
| $^5A''_2$       | 11.93      | 2.777           |           | 0.11 | 0.03      |
| $In_3^-$        |            |                 |           |      |           |
| $^1A'_1$        | 0.0        | 2.979           |           | 0.47 | 0.22      |
| $^3B_2$         | 2.54       | 2.931           | 3.326     | 0.32 | 0.22      |
| $^3A_1^\dagger$ | 3.05       | 3.085           | 2.914     | 0.32 | 0.22      |
| $^3A_2$         | 5.59       | 2.988           | 3.485     | 0.26 | 0.03      |
| $^3B_1^\dagger$ | 6.74       | 3.236           | 2.925     | 0.26 | 0.03      |
| $^5A''_2$       | 3.20       | 3.147           |           | 0.10 | 0.03      |
| $Tl_3^-$        |            |                 |           |      |           |
| $^1A'_1$        | 0.0        | 3.129           |           | 0.47 | 0.22      |
| $^3B_2$         | -0.71      | 3.049           | 3.441     | 0.29 | 0.22      |
| $^3A_1^\dagger$ | 0.09       | 3.237           | 3.023     | 0.29 | 0.22      |
| $^3A_2$         | 0.57       | 3.079           | 3.711     | 0.25 | 0.03      |
| $^3B_1^\dagger$ | 2.58       | 3.387           | 3.026     | 0.26 | 0.03      |
| $^5A''_2$       | -2.94      | 3.263           |           | 0.08 | 0.03      |

† Transition state.

**Table S2** Contribution of the different MO sets (see Figure ??) to the atom-pair DIs for the  $\text{Ga}_3^-$  and  $\text{In}_3^-$  different electronic states. The first values of the triplet correspond to the symmetric atom-pair corresponding to the two short bonds while the second corresponds the atoms pairs forming the largest bond.

| MO sets       | $\text{Ga}_3^-$ |           |           | $\text{In}_3^-$ |           |           |
|---------------|-----------------|-----------|-----------|-----------------|-----------|-----------|
|               | $^1A'_1$        | $^3B_2$   | $^5A''_2$ | $^1A'_1$        | $^3B_2$   | $^5A''_2$ |
| $\Psi_\sigma$ | 0.42            | 0.47/0.31 | 0.34      | 0.35            | 0.40/0.25 | 0.30      |
| $\Psi_\pi$    | 0.32            | 0.36/0.30 | 0.16      | 0.32            | 0.32/0.35 | 0.16      |
| $\Psi_r$      | 0.26            | 0.10/0.09 | 0.07      | 0.26            | 0.08/0.09 | 0.07      |
| $\Psi_t$      | -0.03           | 0.12/0.03 | 0.21      | -0.02           | 0.14/0.03 | 0.22      |

**Table S3** Configuration interaction coefficients (CIC) of the main configurations of the MCSCF wavefunctions of the different triangles studied in the present work (CIC's of 0.09 or larger are shown). Note that the orbitals of the  $\Psi_\sigma$  system ( $(a'_1)^2(e')^2(e')^2$  in  $D_{3h}$ , and  $(a_1)^2(a_1)^2(b_2)^2$ ) are common in all the configurations, and omitted for simplicity.

| State     | $(a''_2)^2(a'_1)^2$             | $(a''_2)^2(e')^2$        | $(a'_1)^2(e')^2$        |       |
|-----------|---------------------------------|--------------------------|-------------------------|-------|
| $^1A'_1$  | $\text{Al}_3^-$                 | 0.88                     | -0.11                   | -0.09 |
|           | $\text{Ga}_3^-$                 | 0.88                     | -0.11                   | -0.09 |
|           | $\text{In}_3^-$                 | 0.88                     | -                       | -     |
|           | $\text{Tl}_3^-$                 | 0.90                     | -0.09                   | -0.11 |
|           | $(b_1)^2(a_1)^1(b_2)^1$         | $(b_1)^2(b_2)^1(2a_1)^1$ | $(a_1)^2(b_2)^1(b_1)^1$ |       |
| $^3B_2$   | $\text{Al}_3^-$                 | 0.88                     | -0.13                   | -0.11 |
|           | $\text{Ga}_3^-$                 | 0.89                     | -0.12                   | -0.12 |
|           | $\text{In}_3^-$                 | 0.90                     | -                       | -0.13 |
|           | $\text{Tl}_3^-$                 | 0.91                     | -                       | -0.15 |
|           | $(a''_2)^1(a'_1)^1(e')^1(e')^1$ |                          |                         |       |
| $^5A''_2$ | $\text{Al}_3^-$                 | 0.91                     |                         |       |
|           | $\text{Ga}_3^-$                 | 0.92                     |                         |       |
|           | $\text{In}_3^-$                 | 0.92                     |                         |       |
|           | $\text{Tl}_3^-$                 | 0.93                     |                         |       |
